# Supplementary material
Source: publisher site journal article supplement (https://www.dovepress.com/article/255751)
Supplement: Supplementary file 1 [file get_supplementary_file.php]

| Age……………………..  Sex…………………..  Marital status……………. | | 1ST visit | 2ND visit | 3rd visit | 4th visit | 5th visit | 6th visit | 7th visit | 9th visit | 10 visit | 11th  visit | 12th  Visit |
| --- | --- | --- | --- | --- | --- | --- | --- | --- | --- | --- | --- | --- |
| Place of Resid |  |  |  |  |  |  |  |  |  |  |  |  |
| Occupation |  |  |  |  |  |  |  |  |  |  |  |  |
| Education |  |  |  |  |  |  |  |  |  |  |  |  |
| Religion |  |  |  |  |  |  |  |  |  |  |  |  |
| Follow upDate |  |  |  |  |  |  |  |  |  |  |  |  |
| Date on ART |  |  |  |  |  |  |  |  |  |  |  |  |
| Weight |  |  |  |  |  |  |  |  |  |  |  |  |
| Pregnancy |  |  |  |  |  |  |  |  |  |  |  |  |
| WHO stage |  |  |  |  |  |  |  |  |  |  |  |  |
| OIs | TB |  |  |  |  |  |  |  |  |  |  |  |
| IP |  |  |  |  |  |  |  |  |  |  |  |
| Cryptococcus spo. |  |  |  |  |  |  |  |  |  |  |  |
| Candidiasis |  |  |  |  |  |  |  |  |  |  |  |
| HepatitisV |  |  |  |  |  |  |  |  |  |  |  |
| Pneumonia |  |  |  |  |  |  |  |  |  |  |  |
| Other |  |  |  |  |  |  |  |  |  |  |  |
| Cotrimoxazole | ADH |  |  |  |  |  |  |  |  |  |  |  |
| Dose |  |  |  |  |  |  |  |  |  |  |  |
| Other medication |  |  |  |  |  |  |  |  |  |  |  |  |
| ARV Drug | Regimen type |  |  |  |  |  |  |  |  |  |  |  |
| Dose |  |  |  |  |  |  |  |  |  |  |  |
| Side effect |  |  |  |  |  |  |  |  |  |  |  |
| Is there switching? |  |  |  |  |  |  |  |  |  |  |  |
| Switching drug type |  |  |  |  |  |  |  |  |  |  |  |
| Reasons of switching |  |  |  |  |  |  |  |  |  |  |  |
| ADH |  |  |  |  |  |  |  |  |  |  |  |  |
| CD4 count |  |  |  |  |  |  |  |  |  |  |  |  |
| Viral load |  |  |  |  |  |  |  |  |  |  |  |  |
